# Supplementary material
Source: MDPI journal article supplement (https://www.mdpi.com/2073-4395/9/11/767)
Supplement: s1 [file s1]

## Supplementary Materials

Figure S1. Flowchart of Preferred Reporting Items for Systematic Reviews and Meta-Analyses (PRISMA). This flowchart summarized the sequence of information gathering and selection.

Figure S2. Normal quantile-quantile plots of the transplanted rice yield (TPR, a) and direct-seeded rice yield (DSR, b). Each dataset was tested for their normality using the Kolmogorov–Smirnov test. The quantile plots that formed the nearly straight lines and  $P > 0.05$  confirmed their normal distributions.

Figure S3. The correlation of actual individual effect size with imputed individual effect size in this meta-analysis. The points is the paired observations from incorporated studies.

Figure S4. The funnel plot to examine publication bias for comparing yield of direct seeded rice and transplanting rice. Blue and red diamond symbol in the bottom are the observed and imputed effect size, respectively. Publication bias is quantified by the difference of observed and imputed effect size according to the Trim and Fill procedure.

## Appendix S1. References included in meta-analysis.

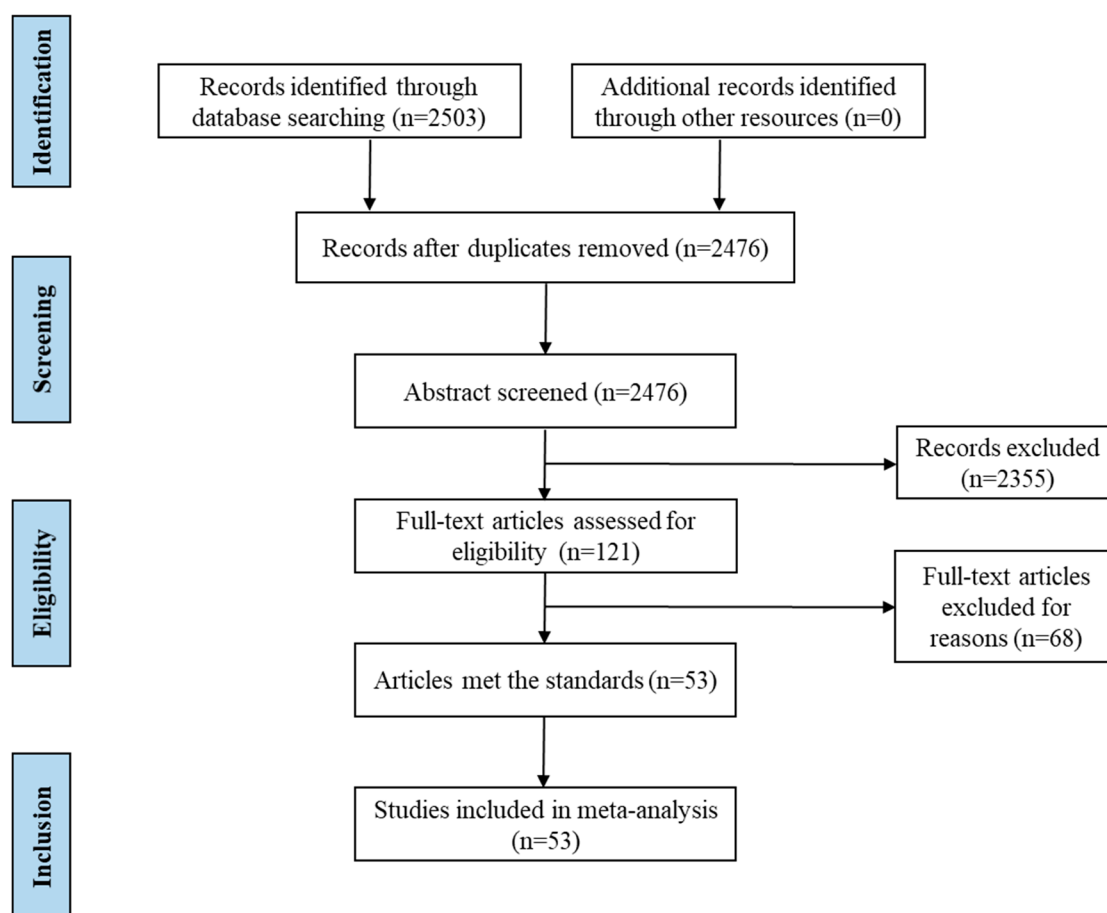

**Figure S1.** Flowchart of Preferred Reporting Items for Systematic Reviews and Meta-Analyses (PRISMA). This flowchart summarized the sequence of information gathering and selection.

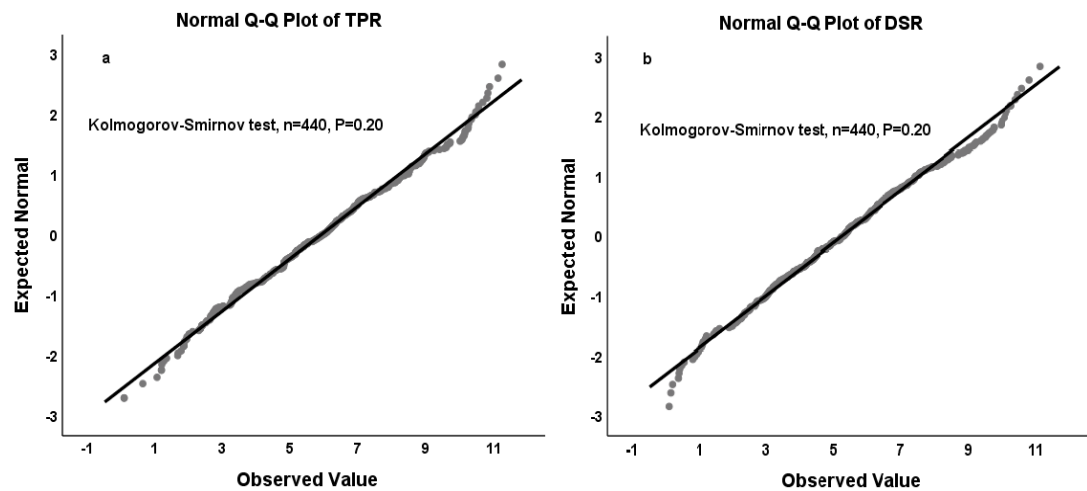

**Figure S2.** Normal quantile-quantile plots of the transplanted rice yield (TPR, a) and direct-seeded rice yield (DSR, b). Each dataset was tested for their normality using the Kolmogorov–Smirnov test. The quantile plots that formed the nearly straight lines and  $P > 0.05$  confirmed their normal distributions.

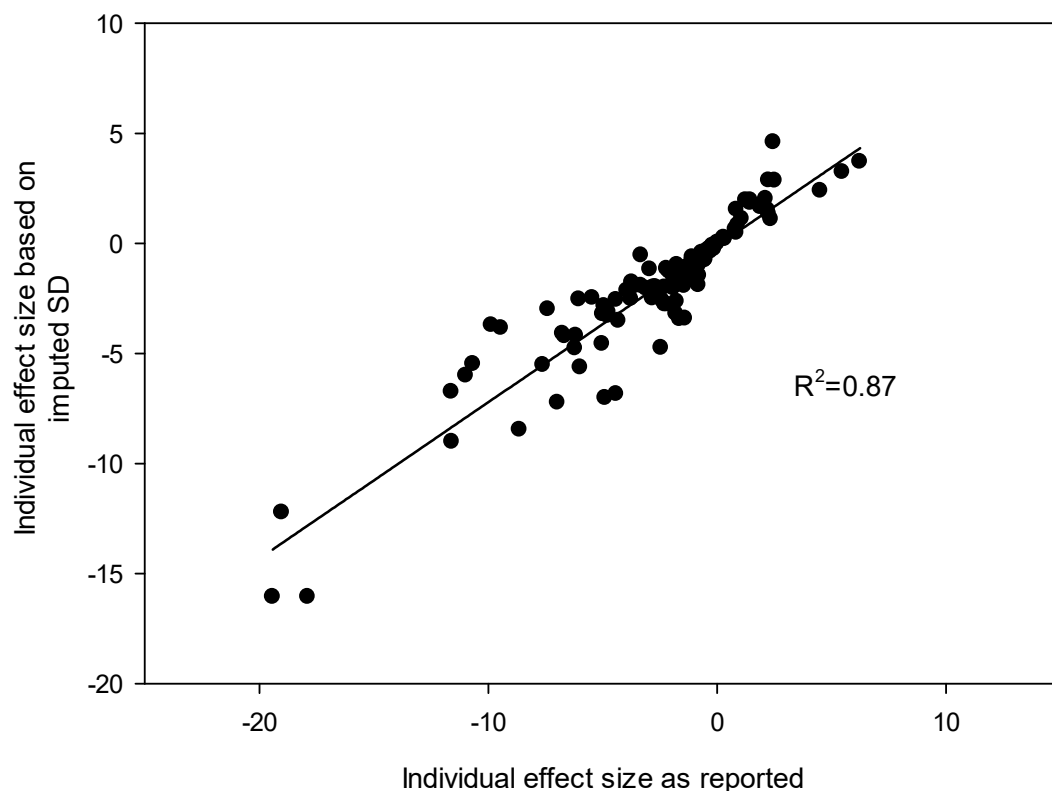

**Figure S3.** The correlation of actual individual effect size with imputed individual effect size in this meta-analysis. The points are the paired observations from incorporated studies.

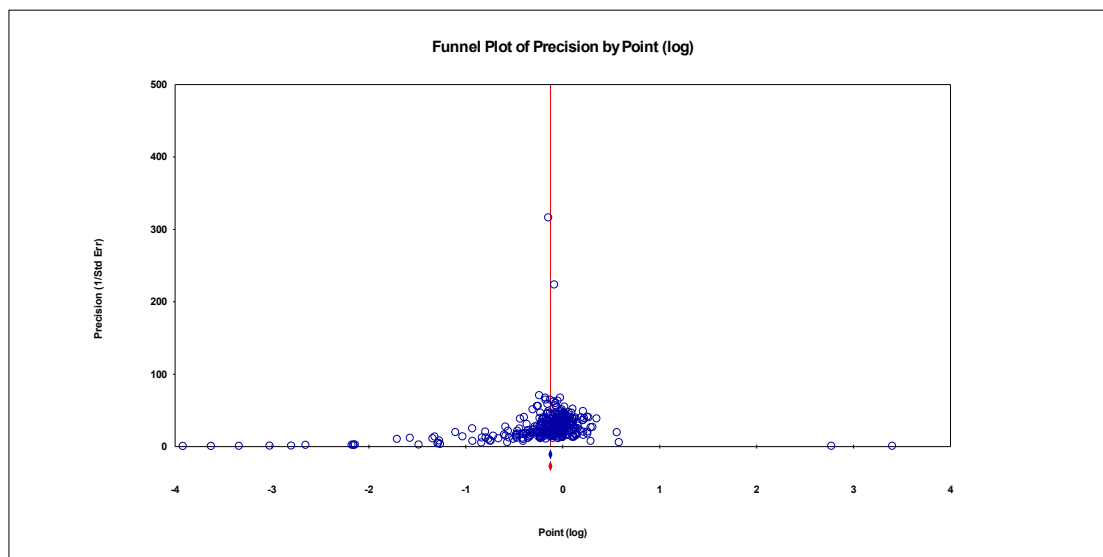

**Figure S4.** The funnel plot to examine publication bias for comparing yield of direct seeded rice and transplanting rice. Blue and red diamond symbol in the bottom are the observed and imputed effect size, respectively. Publication bias is quantified by the difference of observed and imputed effect size according to the Trim and Fill procedure.

#### Appendix S1. References included in meta-analysis.

1. Akhgari, H., Kaviani, B., 2011. Assessment of direct seeded and transplanting methods of rice cultivars in the northern part of Iran. *Afr. J. Agric. Res.* 6, 6492-6498.
1. Akkasali, M., Ladha, J.K., Rickman, J., Laies, J.S., 2006. Comparison of different methods of rice establishment and nitrogen management strategies for lowland rice. *J. Crop Improv.* 16, 173-189.
2. Badshah, M.A., Naimei, T., Zou, Y., Ibrahim, M., Wang, K., 2014. Yield and tillering response of super hybrid rice Liangyoupeiiju to tillage and establishment methods. *Crop J.* 2, 79-86.
3. Baloch, M.S., Hassan, G., Morimoto, T., 2005. Weeding techniques in transplanted and direct wet-seeded rice in Pakistan. *Weed Biol. Manage.* 5, 190-196.
4. Bhuiyan, S.I., Sattar, M. A., Khan, M.A.K., 1995. Improving water use efficiency in rice irrigation through wet-seeding. *Irrig. Sci.* 16, 1-8.
5. Bhushan, L., Ladha, J.K., Gupta, R.K., Singh, S., Tirolpadre, A., Saharawat, Y.S., Gathala, M.K., Pathak, H., 2007. Saving of water and labor in a rice-wheat system with no-tillage and direct seeding technologies. *Agron. J.* 99, 1288-1296.
6. Cabangon, R.J., Tuong, T.P., Abdullah, N.B., 2002. Comparing water input and water productivity of transplanted and direct-seeded rice production systems. *Agric. Water Manage.* 57, 11-31.
7. Cao, Q., Bo, L., Song, Z., Cai, X., Lu, B., 2010. Impact of weedy rice populations on the growth and yield of direct-seeded and transplanted rice. *Weed Biol. Manage.* 7, 97-104.
8. Cassman, K.G., Gines, G.C., Dizon, M.A., Samson, M.I., Alcantara, J.M., 1996. Nitrogen-use efficiency in tropical lowland rice systems: contributions from indigenous and applied nitrogen. *Field Crops Res.* 47, 1-12.
9. Chauhan, B.S., Abeysekera, A.S.K., Wickramarathe, M.S., Kulatunga, S.D., Wickrama, U.B., 2014. Effect of rice establishment methods on weedy rice (*Oryza sativa* L.) infestation and grain yield of cultivated rice in Sri Lanka. *Crop Prot.* 55, 42-49.
10. Chauhan, B.S., Awan, T.H., Abugho, S.B., Evengelista, G., Sudhir-Yadav., 2015. Effect of crop establishment methods and weed control treatments on weed management, and rice yield. *Field Crops Res.* 172, 72-84.
11. Chen, S., Cai, S., Chen, X., Zhang, G., 2009. Genotypic differences in growth and physiological responses to transplanting and direct seeding cultivation in rice. *Rice Sci.* 16, 143-150.
12. Chen, S., Ge, Q., Chu, G., Xu, C., Yan, J., Zhang, X., Wang, D., 2017. Seasonal differences in the rice grain yield and nitrogen use efficiency response to seedling establishment methods in the middle and lower reaches of the Yangtze River in China. *Field Crops Res.* 205.
13. Chhokar, R.S., Sharma, R.K., Gathala, M.K., Pundir, A.K., 2014. Effects of crop establishment techniques on weeds and rice yield. *Crop Prot.* 64, 7-12.

14. Choudhury, B.U., Bouman, B.A.M., Singh, A.K., 2007. Yield and water productivity of rice–wheat on raised beds at New Delhi, India. *Field Crops Res.* 100, 229-239.
15. Datta, S.K.D., Samson, M.I., Wang, K.R., Buresh, R.J., 1988. Nitrogen use efficiency and nitrogen-15 balances in broadcast-seeded flooded and transplanted rice. *Soil Sci. Soc. Am. J.* 52, 849-855.
16. Gathala, M.K., Ladha, J.K., Saharawat, Y.S., Kumar, V., Sharma, P.K., 2011. Effect of tillage and crop establishment methods on physical properties of a medium-textured soil under a seven-year rice-wheat rotation. *Soil Sci. Soc. Am. J.* 75, 1851-1862.
17. Gathala, M.K., Ladha, J.K., Kumar, V., Saharawat, Y.S., Kumar, V., Sharma, P.K., Sharma, S., Pathak, H., 2011. Tillage and crop establishment affects sustainability of south Asian rice–wheat system. *Agron. J.* 103, 961-971.
18. Heu, H., Yong-Ki, K., 2008. Analysis of physiological and ecological characteristics of rice cultivated with direct seeding on dry paddy field. *Jpn. J. Crop Sci.* 66, 442-448.
19. Ikeda, H., Kamoshita, A., Yamagishi, J., Ouk, M., Lor, B., 2008. Assessment of management of direct seeded rice production under different water conditions in Cambodia. *Paddy Water Environ.* 6, 91-103.
20. Liu, H., Hussain, S., Peng, S., Huang, J., Cui, K., Nie, L., 2014. Potentially toxic elements concentration in milled rice differ among various planting patterns. *Field Crops Res.* 168, 19-26.
21. Huang, M., Zou, Y., Feng, Y., Cheng, Z., Mo, Y., Ibrahim, M., Xia, B., Jiang, P., 2011. No-tillage and direct seeding for super hybrid rice production in rice–oilseed rape cropping system. *Eur. J. Agron.* 34, 278-286.
22. Jat, M.L., Gathala, M.K., Ladha, J.K., Saharawat, Y.S., Jat, A.S., Kumar, V., Gupta, R.K., 2009. Evaluation of precision land leveling and double zero-till systems in the rice-wheat rotation: water use, productivity, profitability and soil physical properties. *Soil Tillage Res.* 105, 112-121.
23. Javaid, T., Awan, I.U., Baloch, M.S., Shah, I.H., Nadim, M.A., Khan, E.A., Khakwani, A.A., Abuzar, M.R., 2012. Effect of planting methods on the growth and yield of coarse rice. *J. Anim. Plant Sci.* 22, 358-362.
24. Laik, R., Sharma, S., Idris, M., Singh, A.K., Singh, S.S., Bhatt, B.P., Saharawat, Y.S., Humphreys, E., Ladha, J.K., 2014. Integration of conservation agriculture with best management practices for improving system performance of the rice–wheat rotation in the eastern Indo-Gangetic plains of India. *Agric. Ecosyst. Environ.* 195, 68-82.
25. Liu, H., Hussain, S., Zheng, M., Peng, S., Huang, J., Cui, K., Nie, L., 2015. Dry direct-seeded rice as an alternative to transplanted-flooded rice in Central China. *Agron. Sustainable Dev.* 35, 285-294.
26. Liu, S., Zhang, Y., Lin, F., Zhang, L., Zou, J., 2014. Methane and nitrous oxide emissions from direct-seeded and seedling-transplanted rice paddies in southeast China. *Plant & Soil.* 374, 285-297.
27. Mahajan, G., Chauhan, B.S., Johnson, D.E., 2009. Weed management in aerobic rice in Northwestern Indo-Gangetic Plains. *J. Crop Improv.* 23, 366-382.
28. Maqsood, M., Shehzad, M.A., Ali, S.N.A., Iqbal, M., 2013. Rice cultures and nitrogen rate effects on yield and quality of rice (*Oryza sativa* L.). *Turk. J. Agric. For.* 37, 665-673.
29. McDonald, A.J., Riha, S.J., Duxbury, J.M., Steenhuis, T.S., Lauren, J.G., 2006. Water balance and rice growth responses to direct seeding, deep tillage, and landscape placement: findings from a valley terrace in Nepal. *Field Crops Res.* 95, 367-382.
30. Mukherjee, P.K., Anindya, S., Kumar, M.S., 2008. Critical period of crop-weed competition in transplanted and wet-seeded kharif rice (*Oryza sativa* L.) under terai conditions. *Indian J. Weed Sci.* 40, 147-152.
31. Naresh, R.K. 2013. Rice residues: from waste to wealth through environment friendly and innovative management solutions, it's effects on soil properties and crop productivity. *Int. J. Life Sci. Biotechnol. Pharma Res.* 3, 131-141.
32. Nawaz, A., Farooq, M., Lal, R., Rehman, A., Hafeez-ur-Rehman., 2017. Comparison of conventional and conservation rice-wheat systems in Punjab, Pakistan. *Soil Tillage Res.* 169, 35-43.
33. Oyediran, I.O., Heinrichs, E.A., 2001. Arthropod populations and rice yields in direct-seeded and transplanted lowland rice in West Africa. *Int. J. Pest Manage.* 47, 195-200.
34. Peng, S., Garcia, F.V., Gines, H.C., Laza, R.C., Samson, M.I., Sanico, A.L., Visperas, R.M., Cassman, K.G., 1995. Nitrogen use efficiency of irrigated tropical rice established by broadcast wet-seeding and transplanting. *Fert. Res.* 45, 123-134.
35. Rao, A.N., Moody, K., 1992. Competition between *Echinochloa glabrescens* and rice (*Oryza sativa*). *Int. J. Pest Manage.* 38, 25-29.

36. Rashid, M.H., Alam, M.M., Khan, M.A., Ladha, J.K., 2009. Productivity and resource use of direct-drum-seeded and transplanted rice in puddled soils in rice-rice and rice-wheat ecosystems. *Field Crops Res.* 113, 274-281.
37. Saharawat, Y.S., Singh, B., Malik, R.K., Ladha, J.K., Gathala, M., Jat, M.L., Kumar, V., 2010. Evaluation of alternative tillage and crop establishment methods in a rice-wheat rotation in North Western IGP. *Field Crops Res.* 116, 260-267.
38. Saleh, A.F.M., Bhuiyan, S.I., 1995. Crop and rain water management strategies for increasing productivity of rainfed lowland rice systems. *Agric. Syst.* 49, 259-276.
39. Samar, S., Ladha, J.K., Gupta, R.K., Lav, B., Rao, A.N., 2008. Weed management in aerobic rice systems under varying establishment methods. *Crop Prot.* 27, 660-671.
40. Schnier, H.F., Dingkuhn, M., Datta, S.K.D., Marqueses, E.P., Faronilo, J.E., 1990. Nitrogen-15 balance in transplanted and direct-seeded flooded rice as affected by different methods of urea application. *Biol. Fertil. Soils.* 10, 89-96.
41. Schnier, H.F., Dingkuhn, M., De Datta, S.K., Mengel, K., Faronilo, J.E., 1990. Nitrogen fertilization of direct-seeded flooded vs. transplanted rice: i. nitrogen uptake, photosynthesis, growth, and yield. *Crop Sci.* 30, 1276-1284.
42. Sharma, A.R., Ghosh, A., 2000. Effect of green manuring with *sesbania aculeata* and nitrogen fertilization on the performance of direct-seeded flood-prone lowland rice. *Nutr. Cycling Agroecosyst.* 57, 141-153.
43. Sharma, G., Patil, S.K., Buresh, R.J., Mishra, V.N., Das, R.O., Haefele, S.M., Shrivastava, L.K., 2005. Rice establishment method affects nitrogen use and crop production of rice-legume systems in drought-prone eastern India. *Field Crops Res.* 92, 17-33.
44. Sidhu, A.S., Kooner, R., Verma, A., 2014. On-farm assessment of direct-seeded rice production system under central Punjab conditions. *J. Crop Weed.* 10, 56-60.
45. Singh, S., Sharma, S.N., Prasad, R., 2001. The effect of seeding and tillage methods on productivity of rice-wheat cropping system. *Soil Tillage Res.* 61, 125-131.
46. Sudhir-Yadav, Gill, G., Humphreys, E., Kukal, S.S., Walia, U.S., 2011. Effect of water management on dry seeded and puddled transplanted rice. Part 1: Crop performance. *Field Crops Res.* 120, 112-122.
47. Tabbal, D.F., Bouman, B.A.M., Bhuiyan, S.I., Sibayan, E.B., Sattar, M.A., 2002. On-farm strategies for reducing water input in irrigated rice; case studies in the Philippines. *Agric. Water Manage.* 56, 93-112.
48. Thakur, A.K., Roychowdhury, S., Kundu, D.K., Singh, R., 2004. Evaluation of planting methods in irrigated rice. *Arch. Agron. Soil Sci.* 50, 631-640.
49. Tomita, S., Miyagawa, S., Kono, Y., Noichana, C., Inamura, T., Nagata, Y., Sributta, A., Nawata, E., 2003. Rice yield losses by competition with weeds in rainfed paddy fields in northeast Thailand. *Weed Biol. Manage.* 3, 162-171.
50. Tuong, T.P., Castillo, E.G., Cabangon, R.C., Boling, A., Singh, U., 2002. The drought response of lowland rice to crop establishment practices and N-fertilizer sources. *Field Crops Res.* 74, 243-257.
51. Wiangsamut, B., Mendoza, T.C., Lafarge, T.A., 2013. Growth dynamics and yield of rice genotypes grown in transplanted and direct-seeded fields. *J. Agr. Technol.* 2, 299-316.
52. Won, J.G., Choi, C.D., Sang, C.L., 2008. Tillering, lodging and yield under deep water treatment in direct-seeded rice. *Plant Prod. Sci.* 2, 200-205.
53. Singh, Y., Singh, V.P., Singh, G., Yadav, D.S., Sinha, R.K., Johnson, D.E., Mortimer, A.M., 2011. The implications of land preparation, crop establishment method and weed management on rice yield variation in the rice-wheat system in the Indo-Gangetic Plains. *Field Crops Res.* 121, 64-74.
